# Supplementary material for: Interface effect of mixed phase Pt/ZrO2 catalysts for HCHO oxidation at ambient temperature
Source: Royal Society of Chemistry journal article supplement (doi:10.1039/c7ta03888g), 2017-01-01
Supplement: c7ta03888g1.pdf [file c7ta03888g1.pdf]

## Supporting Information

### Interface Effect of Mixed Phase Pt/ZrO<sub>2</sub> Catalyst for HCHO Oxidation at Ambient Temperature

Xueqin Yang,<sup>†,‡</sup> Xiaolin Yu,<sup>\*,†</sup> Mengya Lin,<sup>†,‡</sup> Maofa Ge,<sup>\*,†,‡,§</sup> Yao Zhao,<sup>#</sup> Fuyi  
Wang<sup>‡,#</sup>

<sup>†</sup>State Key Laboratory for Structural Chemistry of Unstable and Stable Species, CAS  
Research/Education Center for Excellence in Molecular Sciences, Institute of  
Chemistry, Chinese Academy of Sciences, Beijing 100190, P. R. China

<sup>‡</sup>University of Chinese Academy of Sciences, Beijing 100049, P. R. China

<sup>§</sup>Center for Excellence in Regional Atmospheric Environment, Institute of Urban  
Environment, Chinese Academy of Sciences, Xiamen, 361021, P. R. China

<sup>#</sup>Key Laboratory of Analytical Chemistry for Living Biosystems, Institute of  
Chemistry, Chinese Academy of Sciences, Beijing 100190, P. R. China

\*Email: icecoolyu@iccas.ac.cn; gemaofa@iccas.ac.cn

**Table S1** Physical-chemical properties of the ZrO<sub>2</sub> Supports.

| samples             | Surface area<br>(m <sup>2</sup> /g) | Total pore volume<br>(cm <sup>3</sup> /g) | Pore diameter<br>(nm) | Zr 3d <sub>5/2</sub><br>(eV) | O <sub>ads</sub> /O <sub>latt</sub> |
|---------------------|-------------------------------------|-------------------------------------------|-----------------------|------------------------------|-------------------------------------|
| ZrO <sub>2</sub> -M | 81.5                                | 0.25                                      | 3.4/17.5              | 182.0                        | 0.6                                 |
| ZrO <sub>2</sub> -U | 76.1                                | 0.14                                      | 5.6                   | 181.9                        | 2.11                                |
| ZrO <sub>2</sub> -N | 105.0                               | 0.74                                      | 4.3                   | 181.9                        | 2.71                                |
| ZrO <sub>2</sub> -K | 87.3                                | 0.15                                      | 4.9                   | 181.9                        | 2.88                                |

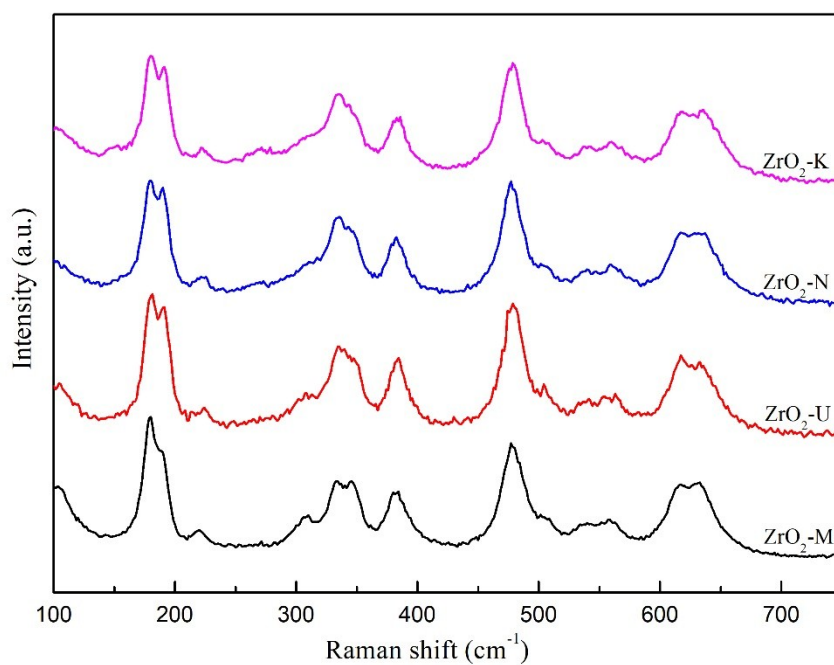**Fig. S1** Raman spectra of the as-prepared ZrO<sub>2</sub> supports.

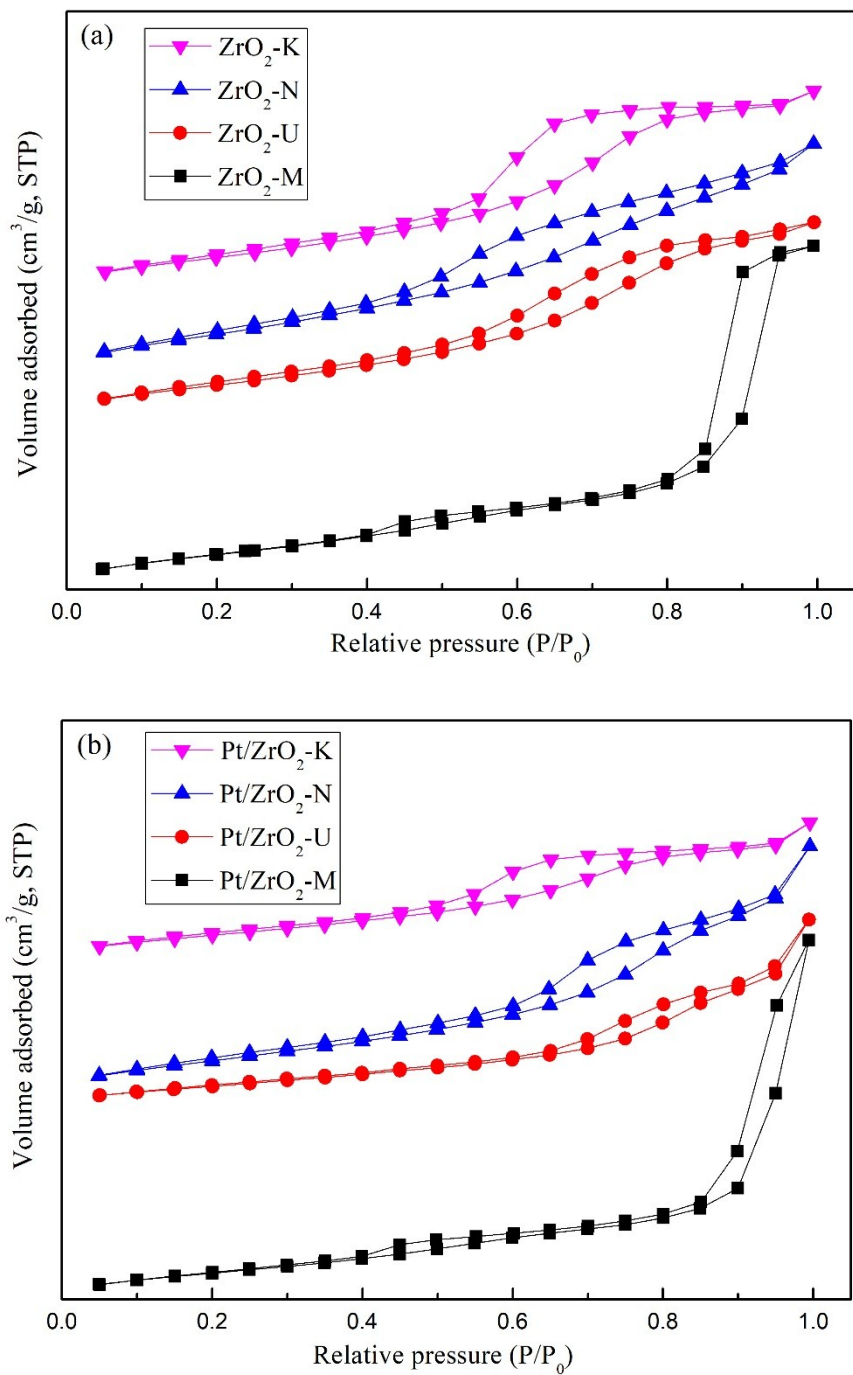

**Fig. S2** Nitrogen adsorption-desorption isotherms of ZrO<sub>2</sub> supports (a) and Pt/ZrO<sub>2</sub> catalysts (b).

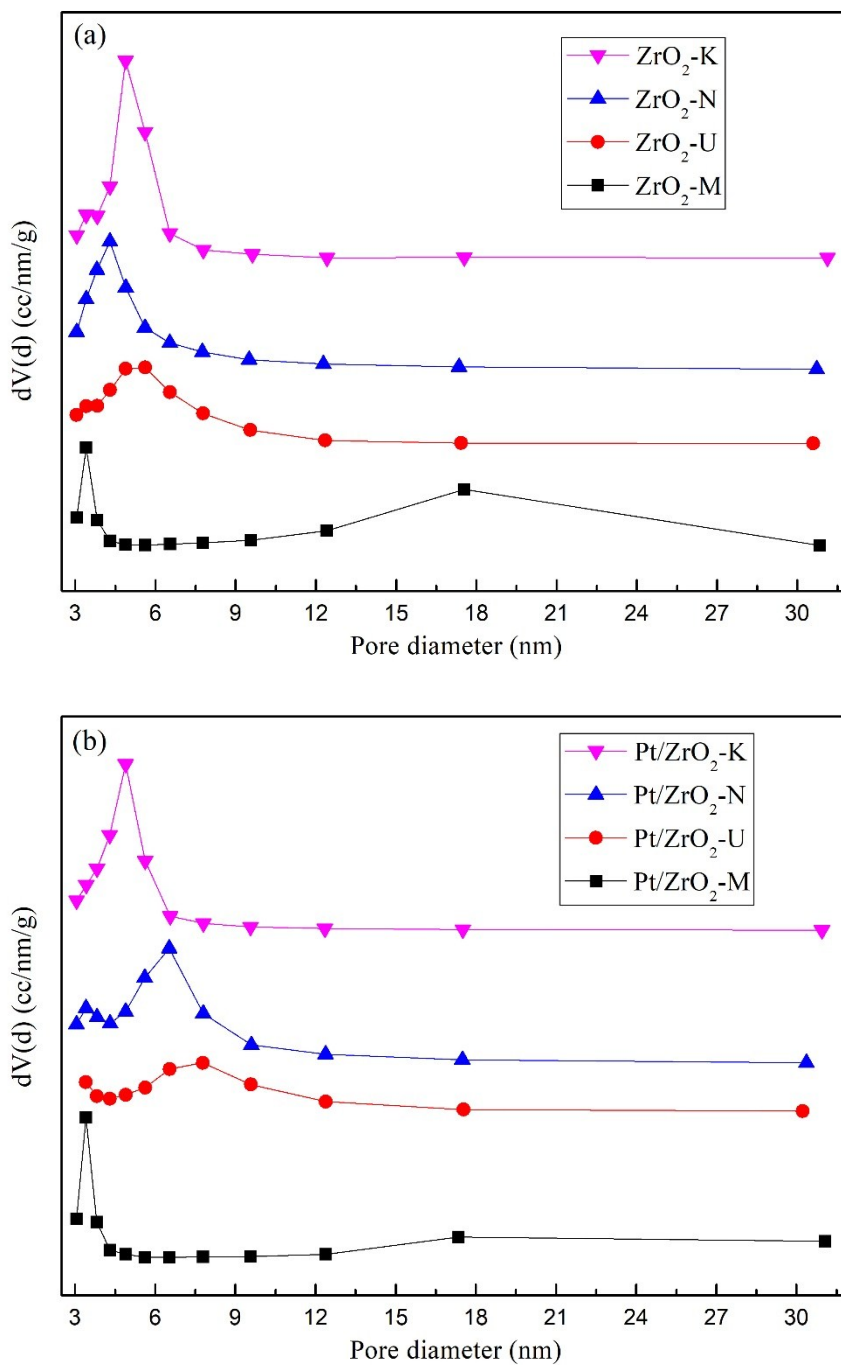

**Fig. S3** Pore-size distribution curves of ZrO<sub>2</sub> supports (a) and Pt/ZrO<sub>2</sub> catalysts (b).

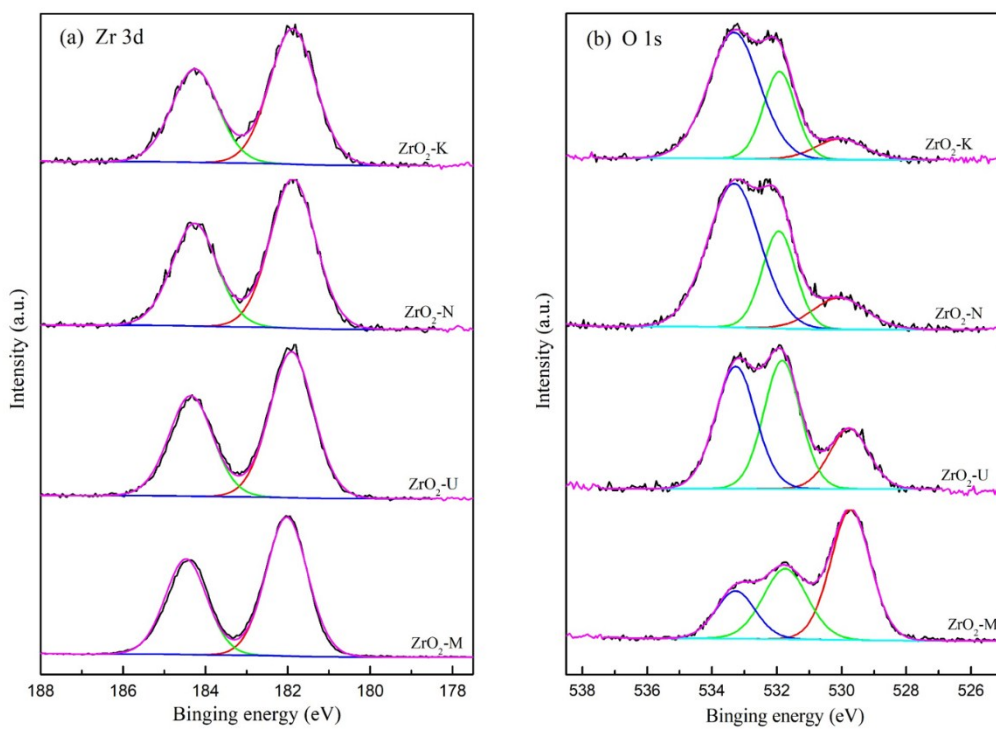

**Fig. S4** XPS spectra of ZrO<sub>2</sub> supports: (a) Zr 3d and (b) O 1s.

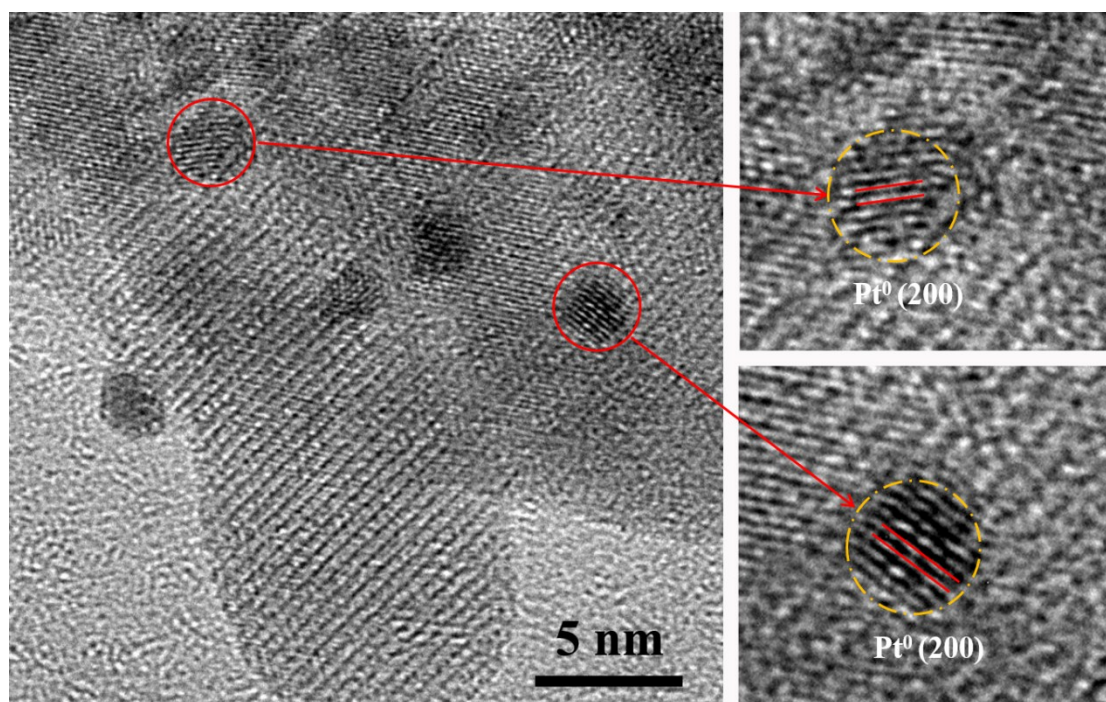

**Fig. S5** HRTEM images for Pt/ZrO<sub>2</sub>-M catalyst with pure monoclinic phase.

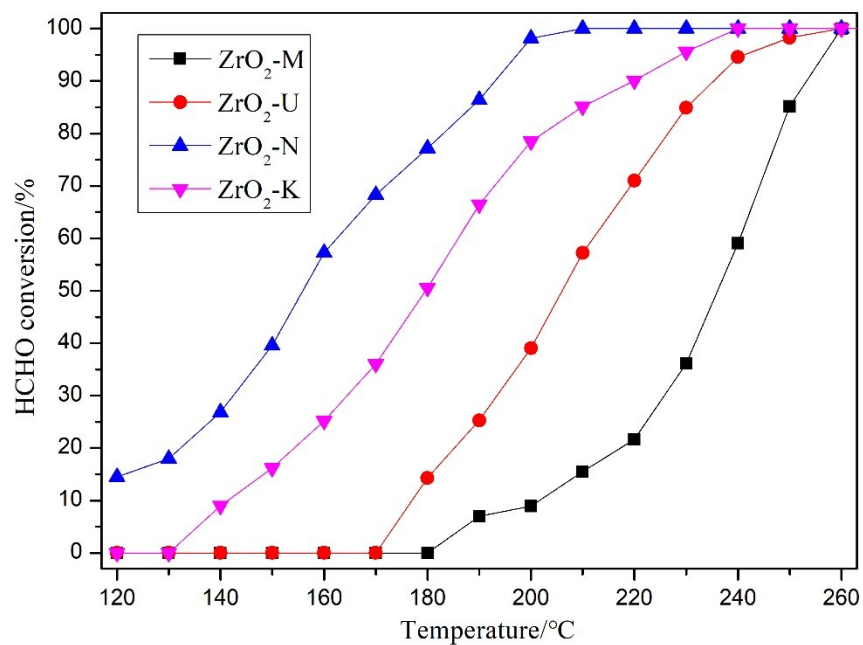

**Fig. S6** HCHO conversion over ZrO<sub>2</sub> supports. Reaction conditions: 100 ppm of HCHO, 20% O<sub>2</sub>, WHSV = 60,000 mL g<sub>cat</sub><sup>-1</sup> h<sup>-1</sup>.

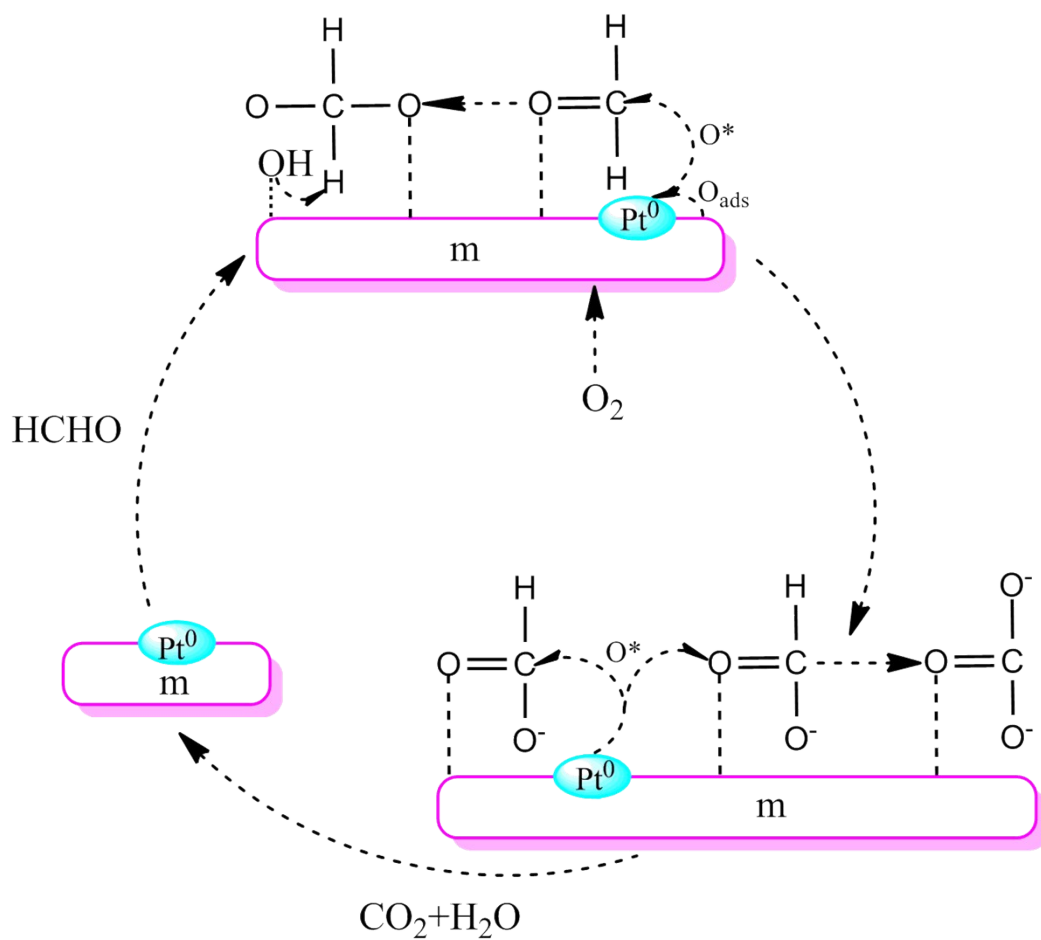

**Scheme S1** The proposed catalytic mechanism of Pt/ZrO<sub>2</sub>-M catalyst for HCHO catalytic oxidation.
